# Supplementary material for: Differences in glutamate receptors and inflammatory cell numbers are associated with the resolution of pain in human rotator cuff tendinopathy
Source: PubMed Central journal article supplement (PMC4498529; doi:10.1186/s13075-015-0691-5), 2015-07-10
Supplement: 13075_2015_691_MOESM1_ESM.pdf [file 13075_2015_691_MOESM1_ESM.pdf]

## Appendix 1 - Antibodies and staining protocols

| Antibody        | Raised in | Dilution | Make      |           | Concentration |
|-----------------|-----------|----------|-----------|-----------|---------------|
| CD34            | mouse     | 1/50     | Dako      | M7165     | 12mg/L        |
| CD45            | mouse     | 1/50     | Dako      | M0701     | -             |
| CD206           | Mouse     | 1/200    | Abcam     | Ab117644  | 0.5mg/ml      |
| Glutamate       | rabbit    | 1/100    | Millipore | AB5018    | -             |
| HIF1 $\alpha$   | mouse     | 1/250    | R&D       | MAB1935   | 0.5mg/ml      |
| KA1             | rabbit    | 1/4000   | Abcam     | Ab67402   | 1mg/ml        |
| LDH             | rabbit    | 1/250    | Abcam     | Ab134187  | -             |
| mGluR1          | mouse     | 1/250    | R&D       | MAB4836   | 0.5mg/ml      |
| mGluR2          | rabbit    | 1/350    | abcam     | Ab118447  | 1mg/ml        |
| mGluR7          | rabbit    | 1/150    | Abcam     | Ab53705   | 1mg/ml        |
| NMDAR1          | mouse     | 1/140    | BD        | 556308    | 0.5mg/ml      |
| PCNA            | rabbit    | 1/200    | DAKO      | M0879     | 327mg/L       |
| PGP9.5          | rabbit    | 1/200    | Thermo    | PA1-21097 | 0.2mg/ml      |
| VEGF            | goat      | 1/200    | R&D       | AB-293-NA | 1mg/ml        |
| Immunoglobulins | rabbit    | 1/2000   | Dako      | X0903     | -             |
| IgG1            | mouse     | 1/600    | Dako      | X0931     | -             |
| Immunoglobulins | goat      | 1/40     | Dako      | F0250     | -             |

### A1.1 Deparaffinisation and target retrieval

1. Working solution prepared according to manufacturer's instructions: 30mls of EnVision™ Flex high pH target retrieval solution mixed with 1470mls of deionised water to make up 1.5l of solution.
2. PT Link Tank filled with 1.5l of working solution in order to cover tissue sections.
3. PT Link set to preheat solution to 65°C.
4. Formalin fixed paraffin-embedded tissue sections immersed into pre-heated target retrieval solution and incubated at 97°C for 20 minutes.
5. Sections left to cool to 65°C in PT Link.
6. Slide racks removed from PT Link and immersed in PT Link Rinse Station containing diluted, room temperature Dako Wash Buffer (20X).
7. Slides left in the Wash Buffer for 5-10 minutes.

### A1.2 Haematoxylin and Eosin staining protocol

The programming steps and Incubation times are pre-programmed on the DAKO® Autostainer as follows:

1. Modified Mayer's Hematoxylin – 10 minutes
2. Double Rinse
3. Bluing Reagent – 2 minutes
4. Rinse + Blow
5. Eosin Y – 1 minute
6. Double Rinse
7. 100% ethanol – 1 minute
8. Blow

Use a minimum of 400  $\mu$ L of reagent per slide. Prior to starting a run, slides are deparaffinised and rinsed in water. The slides are pre-soaked in a working solution of DAKO® Special Stains Wash Buffer for 5 minutes. The slides are then placed on the

DAKO® Autostainer and the run is begun. After the run is complete, the slides are dehydrated through 2 changes of 100% alcohol and cleared in 2 changes of xylene. Finally the slides are coverslipped with permanent mounting media.

### **A1.3 Immunostaining protocol without linker for mouse/rabbit raised primary antibodies (IS-1)**

|                              |               |                                                  |
|------------------------------|---------------|--------------------------------------------------|
| 1. Rinse                     | 1 minute      | Buffer                                           |
| 2. Peroxidase Block Solution | 5 minutes     | 200µl EnVision FLEX Peroxidase Blocking Solution |
| 3. Rinse                     | 1 minute      | Buffer                                           |
| 4. Primary antibody          | Variable time | 200µl primary antibody raised in mouse or rabbit |
| 5. Rinse                     | 1 minute      | Buffer                                           |
| 6. Detection                 | 20 minutes    | 200µl EnVision FLEX/HRP                          |
| 7. Rinse                     | 1 minute      | Buffer                                           |
| 8. Rinse                     | 1 minute      | Buffer                                           |
| 9. Stain                     | 5 minutes     | 200µl DAB substrate working solution             |
| 10. Stain                    | 5 minutes     | 200µl DAB substrate working solution             |
| 11. Rinse                    | 1 minute      | Buffer                                           |
| 12. Counterstain             | 5 minutes     | 200µl EnVision FLEX Haemotoxylin                 |
| 13. Rinse                    | 1 minute      | Deionised water                                  |
| 14. Rinse                    | 5 minutes     | Buffer                                           |
| 15. Rinse                    | 1 minute      | Deionised water                                  |

### **A1.4 Immunostaining protocol without linker for goat/sheep raised primary antibodies (IS-2)**

|                              |               |                                                  |
|------------------------------|---------------|--------------------------------------------------|
| 1. Rinse                     | 1 minute      | Buffer                                           |
| 2. Peroxidase Block Solution | 5 minutes     | 200µl EnVision FLEX Peroxidase Blocking Solution |
| 3. Rinse                     | 1 minute      | Buffer                                           |
| 4. Primary antibody          | Variable time | 200µl primary antibody raised in sheep or goat   |
| 5. Rinse                     | 1 minute      | Buffer                                           |
| 6. Secondary antibody        | 20 minutes    | 200µl Anti Goat or Sheep Ig HRP                  |
| 7. Rinse                     | 1 minute      | Buffer                                           |
| 8. Detection                 | 20 minutes    | 200µl EnVision FLEX/HRP                          |
| 9. Rinse                     | 1 minute      | Buffer                                           |
| 10. Rinse                    | 1 minute      | Buffer                                           |
| 11. Stain                    | 5 minutes     | 200µl DAB substrate working solution             |
| 12. Stain                    | 5 minutes     | 200µl DAB substrate working solution             |
| 13. Rinse                    | 1 minute      | Buffer                                           |
| 14. Counterstain             | 5 minutes     | 200µl EnVision FLEX Haemotoxylin                 |
| 15. Rinse                    | 1 minute      | Deionised water                                  |
| 16. Rinse                    | 5 minutes     | Buffer                                           |
| 17. Rinse                    | 1 minute      | Deionised water                                  |

### **A1.5 Immunostaining protocol with linker for mouse/rabbit raised primary antibodies (IS-3)**

|                              |               |                                                  |
|------------------------------|---------------|--------------------------------------------------|
| 1. Rinse                     | 1 minute      | Buffer                                           |
| 2. Peroxidase Block Solution | 5 minutes     | 200µl EnVision FLEX Peroxidase Blocking Solution |
| 3. Rinse                     | 1 minute      | Buffer                                           |
| 4. Primary antibody          | Variable time | 200µl primary antibody raised in mouse or rabbit |
| 5. Rinse                     | 1 minute      | Buffer                                           |
| 6. Linker                    | 15 minutes    | 200µl EnVision FLEX+ Rabbit or Mouse Linker      |
| 7. Rinse                     | 1 minute      | Buffer                                           |
| 8. Detection                 | 20 minutes    | 200µl EnVision FLEX/HRP                          |
| 9. Rinse                     | 1 minute      | Buffer                                           |
| 10. Rinse                    | 1 minute      | Buffer                                           |
| 11. Stain                    | 5 minutes     | 200µl DAB substrate working solution             |
| 12. Stain                    | 5 minutes     | 200µl DAB substrate working solution             |
| 13. Rinse                    | 1 minute      | Buffer                                           |
| 14. Counterstain             | 5 minutes     | 200µl EnVision FLEX Haemotoxylin                 |
| 15. Rinse                    | 1 minute      | Deionised water                                  |
| 16. Rinse                    | 5 minutes     | Buffer                                           |
| 17. Rinse                    | 1 minute      | Deionised water                                  |

### **A1.6 Immunostaining protocol with linker for goat/sheep raised primary antibodies (IS-4)**

|                              |               |                                                  |
|------------------------------|---------------|--------------------------------------------------|
| 1. Rinse                     | 1 minute      | Buffer                                           |
| 2. Peroxidase Block Solution | 5 minutes     | 200µl EnVision FLEX Peroxidase Blocking Solution |
| 3. Rinse                     | 1 minute      | Buffer                                           |
| 4. Primary antibody          | Variable time | 200µl primary antibody raised in sheep or goat   |
| 5. Rinse                     | 1 minute      | Buffer                                           |
| 6. Secondary antibody        | 20 minutes    | 200µl Anti Goat or Sheep Ig HRP                  |
| 7. Rinse                     | 1 minute      | Buffer                                           |
| 8. Rinse                     | 1 minute      | Buffer                                           |
| 9. Linker                    | 15 minutes    | 200µl EnVision FLEX+ Rabbit Linker               |
| 10. Rinse                    | 1 minute      | Buffer                                           |
| 11. Detection                | 20 minutes    | 200µl EnVision FLEX/HRP                          |
| 12. Rinse                    | 1 minute      | Buffer                                           |
| 13. Rinse                    | 1 minute      | Buffer                                           |
| 14. Stain                    | 5 minutes     | 200µl DAB substrate working solution             |
| 15. Stain                    | 5 minutes     | 200µl DAB substrate working solution             |
| 16. Rinse                    | 1 minute      | Buffer                                           |
| 17. Counterstain             | 5 minutes     | 200µl EnVision FLEX Haemotoxylin                 |
| 18. Rinse                    | 1 minute      | Deionised water                                  |
| 19. Rinse                    | 5 minutes     | Buffer                                           |
| 20. Rinse                    | 1 minute      | Deionised water                                  |

## A1.7 Dehydration, clearing and permanent mounting

1. Slides removed from Autostainer slide racks and placed into Leica slide racks.
2. Dehydrate
 

|          |              |
|----------|--------------|
| 1 minute | 70% alcohol  |
| 1 minute | 90% alcohol  |
| 1 minute | 100% alcohol |
3. Clear
 

|           |        |
|-----------|--------|
| 5 minutes | Xylene |
| 5 minutes | Xylene |
4. Mount                   Pertex mountant and application of cover slips.

## Appendix 2 – modified Bonar scoring system

| Modified Bonar Score for the rotator cuff                                 | Grade 0                                                                                                                                       | Grade 1                                                                                                                                                | Grade 2                                                                                                                                                           | Grade 3                                                                                   |
|---------------------------------------------------------------------------|-----------------------------------------------------------------------------------------------------------------------------------------------|--------------------------------------------------------------------------------------------------------------------------------------------------------|-------------------------------------------------------------------------------------------------------------------------------------------------------------------|-------------------------------------------------------------------------------------------|
| Cell morphology (four fields of view 100X)                                | Inconspicuous elongated spindle shaped nuclei with no obvious cytoplasm                                                                       | Increased roundness: nucleus becomes more ovoid to round in shape without conspicuous cytoplasm                                                        | Increased roundness and size: the nucleus is round, slightly enlarged and a small amount of cytoplasm is visible                                                  | Nucleus is round. , large with abundant cytoplasm and lacuna formation (chondroid change) |
| Collagen arrangement (one field of view 100X)                             | Collagen arranged in tightly cohesive well demarcated bundles with a smooth dense bright homogenous polarization pattern with normal crimping | Diminished fibre polarization; separation of individual fibre bundles but with maintenance of overall bundle architecture Non homogeneous polarization | Bundle changes; separation and loss of demarcation of fibre bundles, giving rise to expansion of the tissue overall and clear loss of normal polarization pattern | Marked separation of fibre bundles with complete loss of architecture                     |
| Cellularity (mean and standard deviation of 100X images of whole section) | Mean cell count <12 and standard deviation of count <7                                                                                        | Either mean $\geq 12$ and < 16, and/or standard deviation of count $\geq 7$ and < 10                                                                   | Either mean $\geq 16$ and < 20, and/or standard deviation of count $\geq 10$ and < 13                                                                             | Either mean $\geq 20$ , and/or standard deviation $\geq 13$                               |
| Vascularity (mean vessel count of 100X images of whole substance)         | >1.2                                                                                                                                          | < 1.2 and $\geq 0.8$                                                                                                                                   | < 0.8 and $\geq 0.4$                                                                                                                                              | < 0.4                                                                                     |
| Ground substance (one field of view 100X)                                 | Not stainable ground substance                                                                                                                | Stainable mucin between bundles but bundles still discrete                                                                                             | Stainable mucin within bundles with loss of clear demarcation of bundles                                                                                          | Abundant mucin throughout the section with inconspicuous collagen staining                |



## Appendix 3 – Primer details

| Primer     | Company       |            | 5' to 3' sequence<br>(or Qiagen code if QuantiTect) | Annealing<br>temperature (°C) | Amplicon size<br>(bp) |
|------------|---------------|------------|-----------------------------------------------------|-------------------------------|-----------------------|
| Beta actin | Eurofins      | Fwd<br>Rev | CATGTACGTTGCTATCCAGGC<br>CTCCTTAATGTCACGCACGAT      | 59                            |                       |
| CASP3      | Qiagen        |            | QT00023947                                          |                               | 147                   |
| COL1A1     | Qiagen        |            | QT00037793                                          |                               | 118                   |
| COL3A1     | Qiagen        |            | QT00058233                                          |                               | 95                    |
| GAPDH      | Qiagen        |            | QT00079247                                          |                               | 95                    |
| GRIK1      | Primer Design | Fwd<br>Rev | CCTCTCTCCTTCTTCGTTAGTCT<br>TCTCCCTCATTGCTCCTTTGG    | 57                            | 99                    |
| GRIN1      | Primer Design | Fwd<br>Rev | GCCATCCTAGTTAGCCATCCA<br>ACGGGTATGCGGTAGAAGC        | 57                            | 89                    |
| GRM1       | Primer Design | Fwd<br>Rev | GCTGGCATCTTCCTTGTTATG<br>GTCATAAAGCAGAGTAGCACATC    | 58                            | 125                   |
| GRM2       | Qiagen        |            | QT00020356                                          |                               | 133                   |
| GRM5       | Primer Design | Fwd<br>Rev | GTGACCCTGAACCCATTGC<br>ATGATGAAGACTACAGTAACAAAACAG  | 56                            | 82                    |
| GRM7       | Qiagen        |            | QT00069727                                          |                               | 133                   |
| IL1B       | Qiagen        |            | QT00021385                                          |                               | 117                   |
| LDHA       | Primer Design | Fwd<br>Rev | GGAATGAATGTTGCTGGTGTCT<br>GGATGTGTAGCCTTTGAGTTGA    | 57                            | 141                   |
| MRC1       | Primer Design | Fwd<br>Rev | TGGGTTCTCTCTGGTTTCC<br>CAACATTTCTGAACAATCCTATCCA    | 56                            | 114                   |
| mTOR       | Primer Design | Fwd<br>Rev | CTGATGCTGGACCGTCTGA<br>TCTTGTTAGTCTAAATGGAATCTTCTC  | 56                            | 114                   |
| PCNA       | Primer Design | Fwd<br>Rev | GCCGAAACCAGCTAGACTTT<br>TCGTTGATGAGGTCCTTGAGT       | 57                            | 140                   |
| TBP1       | Qiagen        |            | QT00000721                                          |                               | 132                   |
| TNF1       | Qiagen        |            | QT00029162                                          |                               | 98                    |
| UCLH1      | Qiagen        |            | QT00092666                                          |                               | 110                   |
| VEGF       | Primer Design | Fwd<br>Rev | CCAGGAAAGACTGATACAGAACG<br>GGTTTCTGGATTAAGGACTGTTC  | 57                            | 93                    |

## Appendix 4 - P values sorted according to the Benjamini-Hochberg procedure

| Sorted P values | $d \times i/n$ | Is $P \leq d \times i/n$ ? | Tissue marker |
|-----------------|----------------|----------------------------|---------------|
| 0.0004          | 0.003          | yes                        | CD206         |
| 0.0019          | 0.006          | yes                        | mGluR7        |
| 0.0028          | 0.009          | yes                        | KA1           |
| 0.004           | 0.013          | yes                        | VEGF          |
| 0.007           | 0.016          | yes                        | LDH           |
| 0.0079          | 0.019          | yes                        | PGP9.5        |
| 0.038           | 0.022          | no                         | CD45          |
